# Supplementary material
Source: PubMed Central journal article supplement (PMC8349313)

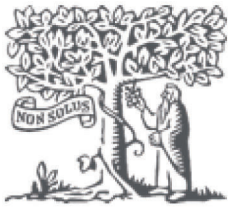

ELSEVIER

# Certificate of Elsevier Language Editing Services

The following article was edited by Elsevier Language Editing Services:  
**"Deep Learning and Lung UltraSound for Covid-19  
pneumonia detection and severity classification"**

**Authored by:**

**Marco La Salvia, Gianmarco Secco, Emanuele Torti, Giordana Florimbi, Luca  
Guido, Paolo Lago, Francesco Salinaro, Stefano Perlini, Francesco Leporati**

Date: 23-Jul-2021

Serial number: LEEEX-14905-8A34D22DB98B

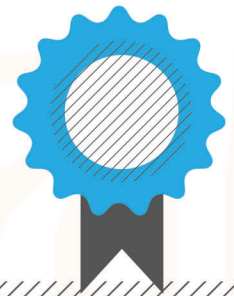

Supplement: mmc1.pdf [file mmc1.pdf]
